# Supplementary material for: Fluorene functionalized porphyrins as broadband absorbers for TiO2nanocrystalline solar cells
Source: Royal Society of Chemistry journal article supplement (doi:10.1039/c4ta01954g), 2014-06-19
Supplement: c4ta01954g1.pdf [file c4ta01954g1.pdf]

## Electronic Supplementary Materials (ESI)

# Fluorene Functionalized Porphyrins as Broadband Absorbers for TiO<sub>2</sub> Nanocrystalline Solar Cells

Wenhui Li<sup>a</sup>, Liping Si<sup>b,c</sup>, Zonghao Liu<sup>a</sup>, Zhixin Zhao<sup>\*a</sup>, Hongshan He<sup>\*b,c</sup>, Kai Zhu<sup>d</sup>, Brian Moore<sup>e</sup> and Yi-Bing Cheng<sup>a,f</sup>,

*<sup>a</sup>Michael Grätzel Center for Mesoscopic Solar Cells, Wuhan National Laboratory for Optoelectronics Department, School of Optical and Electronic Information, Huazhong University of Science and Technology, 1037 Luoyu Road, Wuhan 430074, P. R. China; <sup>b</sup>Department of Chemistry, Eastern Illinois University, Charleston, IL, 61920, USA; <sup>c</sup>Center for Advanced Photovoltaics, South Dakota State University, Brookings, SD 57007, USA; <sup>d</sup>Chemical and Materials Science Center, National Renewable Energy Laboratory, Golden, CO 84041, USA; <sup>e</sup>University Networking Research & Services, South Dakota State University, Brookings, SD 57007, USA; <sup>f</sup>Department of Materials Engineering, Monash University, Melbourne, Victoria, 3800, Australia.*

## EXPERIMENTAL

### General

All chemicals were obtained from commercial sources and used directly without further purification. Solvents used for reactions were dried by standard procedures. All reactions were carried out under N<sub>2</sub> atmosphere. The synthesis procedure of bis(9,9-dihexyl-9H-fluoren-7-yl)amine (**BFA**) has been reported elsewhere. 2,7-diiodo-9,9-dihexyl-9H-fluorene (**DIDF**), bis(4-hexylphenyl)amine (**BPA**) and [5-

Bromo-15-(triisopropylsilyl)ethynyl-10,20-bis(2,6-di-octoxyphenyl)porphyrinato] zinc(II)(**3**) were prepared according to literature methods<sup>1,2</sup> and confirmed by <sup>1</sup>H NMR. 2-Iodo-9,9-dihexyl-9H-fluorene (**1c**) was purchased from Sigma-Aldrich. Nuclear magnetic resonance (NMR) spectra were recorded on a Bruker AV400 spectrometer.

### Synthesis of ZZX-Nx (x=3,4,5)

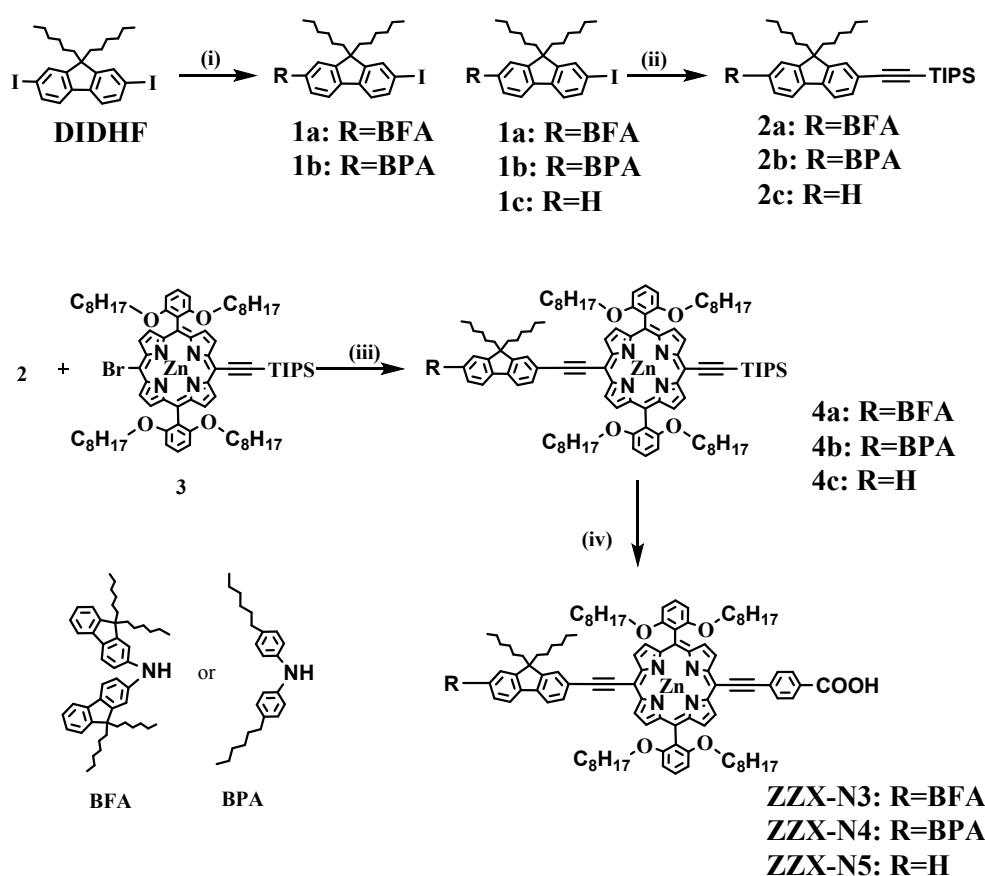

**Scheme 1** Synthesis of fluorene-based porphyrin dyes. Reaction conditions: (i) copper bronze, K<sub>2</sub>CO<sub>3</sub>, 18-crown-6, 1,2-dichlorobenzene, reflux, (ii) ethynyltriisopropylsilane, Pd(PPh<sub>3</sub>)<sub>2</sub>Cl<sub>2</sub>, CuI, THF, TEA, (iii) (a) TBAF, THF; (b) Pd(PPh<sub>3</sub>)<sub>2</sub>Cl<sub>2</sub>, CuI, THF, TEA, (iv) (a) TBAF, THF; (b) Pd<sub>2</sub>(dba)<sub>3</sub>, AsPh<sub>3</sub>, 4-iodobenzoic acid, THF, TEA.

### Synthesis

**The synthesis of 1a~1b.** Diarylamines (1.5 mmol) and **DIDF** (1.8 mmol) were

dissolved in 8 ml 1,2-dichlorobenzene at room temperature under N<sub>2</sub>. To this mixture were added K<sub>2</sub>CO<sub>3</sub> (2 g, 14.40 mmol), 18-crown-6 (0.135 g, 0.50 mmol) and copper bronze (0.563 g, 8.86 mmol). The reaction mixture was heated at 180°C for overnight. Upon completion, the brown mixture was filtered through a short silica gel plug and the yellow solution was concentrated, resulting in a yellow–brown oil. 1,2-Dichlorobenzene was removed under reduced pressure. Purification was accomplished by column chromatography using hexane as eluent.

**1a.** Yellow oil (0.64 g, 37.4%). <sup>1</sup>H NMR ((CD<sub>3</sub>)<sub>2</sub>CO, 400MHz) δ 7.83 (s, 1H), 7.71 (d, J=8.32Hz, 6H), 7.54 (d, J=8.00Hz, 1H), 7.43 (d, J=7.36Hz, 2H), 7.30-7.36 (m, 7H), 7.05-7.09 (m, 3H), 1.90-2.04 (m, 12H), 1.10-1.20 (m, 36H), 0.64-0.84 (m, 30H). MS (m/z, APCI) calcd for C<sub>75</sub>H<sub>98</sub>IN 1140.5, found 1141.0 [M]<sup>+</sup>.

**1b.** Colorless oil (0.49 g, 40.7%). <sup>1</sup>H NMR (CDCl<sub>3</sub>, 400MHz) δ 7.30 (d, J=1.40Hz, 1H), 7.61 (s, 1H), 7.49 (d, J=8.16Hz, 1H), 7.34 (d, J=7.68Hz, 1H), 7.04-7.08 (m, 10H), 2.59 (s, 4H), 1.83 (t, J=8.28Hz, 4H), 1.60-1.67 (m, 4H), 1.34-1.35 (m, 12H), 1.07-1.19 (m, 12H), 0.92 (t, J=6.74Hz, 6H), 0.84 (t, J=7.16Hz, 6H), 0.66-0.68 (m, 4H). MS (m/z, APCI) calcd for C<sub>49</sub>H<sub>66</sub>IN 796.0, found 796.4 [M]<sup>+</sup>.

**The synthesis of 2a~2c.** Compound **1** (0.61 mmol) was dissolved in a mixture of dry THF (22 ml) and dry TEA (4 ml) under N<sub>2</sub>. (Triisopropylsilyl)acetylene (1.53 mmol), Pd(PPh<sub>3</sub>)Cl<sub>2</sub> (0.12 mmol) and CuI (0.18 mmol) were added. The reaction mixture was stirred at room temperature under dark for 4.5h. The solvent was removed under reduced pressure and the residue was subjected to column chromatography using hexane as eluent.

**2a.** Yellow solid (0.70 g, 96.0%). <sup>1</sup>H NMR ((CD<sub>3</sub>)<sub>2</sub>CO, 400MHz) δ 7.72 (t, J=6.14Hz, 6H), 7.57 (s, 1H), 7.49 (d, J=7.84Hz, 1H), 7.44 (d, J=6.76Hz, 2H), 7.30-7.34 (m, 7H), 7.06-7.09 (m, 3H), 1.91-2.04 (m, 12H), 1.11-1.19 (m, 57H), 0.64-0.84 (m, 30H). MS (m/z, APCI) calcd for C<sub>86</sub>H<sub>119</sub>NSi 1195.0, found 1195.5 [M]<sup>+</sup>.

**2b.** Yellow solid (0.49 g, 94.4%).  $^1\text{H}$  NMR ( $\text{CDCl}_3$ , 400MHz)  $\delta$  7.51 (d,  $J=8.08\text{Hz}$ , 2H), 7.80 (d,  $J=7.80\text{Hz}$ , 1H), 7.37 (s, 1H), 7.03-7.09 (m, 10H), 2.59 (s, 4H), 1.81-1.90 (m, 4H), 1.60-1.68 (m, 4H), 1.19 (s, 21H), 1.09-1.12 (m, 12H), 0.92 (t,  $J=6.64\text{Hz}$ , 6H), 0.83 (t,  $J=7.14\text{Hz}$ , 6H), 0.67-0.69 (m, 4H). MS ( $m/z$ , APCI) calcd for  $\text{C}_{60}\text{H}_{87}\text{NSi}$  850.4, found 851.1  $[\text{M}+1]^+$ .

**2c.** Yellow oil (0.29 g, 91.8%).  $^1\text{H}$  NMR ( $\text{CDCl}_3$ , 400MHz)  $\delta$  7.69 (d,  $J=7.64\text{Hz}$ , 1H), 7.62 (d,  $J=7.80\text{Hz}$ , 1H), 7.47 (d,  $J=7.80\text{Hz}$ , 1H), 7.43 (s, 1H), 7.34-7.35 (m, 3H), 1.97 (t,  $J=4.15\text{Hz}$ , 4H), 1.20 (s, 21H), 1.07-1.06 (m, 12H), 0.79 (t,  $J=7.06\text{Hz}$ , 6H), 0.61-0.66 (m, 4H). MS ( $m/z$ , APCI) calcd for  $\text{C}_{36}\text{H}_{54}\text{Si}$  514.9, found 515.3  $[\text{M}]^+$ .

**The synthesis of 4a~4c.** To a solution of Compound **2** (0.82 mmol) in dry THF (100 ml) was added TBAF (4.91 ml, 1M in THF) under  $\text{N}_2$ . The reaction mixture was stirred at room temperature for 0.5h and then quenched by water. The mixture was extracted with  $\text{CH}_2\text{Cl}_2$  and dried over anhydrous  $\text{MgSO}_4$ . The solvent of organic layer was removed under reduced pressure. The residue was dissolved in a mixture of dry THF (80 ml) and dry TEA (16 ml) and degassed with nitrogen for 30 minutes. Then  $\text{Pd}(\text{PPh}_3)\text{Cl}_2$  (0.077 mmol), CuI (0.077 mmol), and brominated porphyrin **3** (0.39 mmol) were added. The solution was refluxed under  $\text{N}_2$  for 4h. Then the solvent was removed under reduced pressure and residue was subjected to column chromatography (silica gel) using  $\text{CH}_2\text{Cl}_2/\text{hexane}=1/3(\text{v:v})$  as eluent. The product was recrystallized from  $\text{CH}_2\text{Cl}_2/\text{MeOH}$ .

**4a.** Green solid (230 mg, 25.8%).  $^1\text{H}$  NMR ( $\text{CDCl}_3/\text{d}_5\text{-pyridine}$ , 400MHz)  $\delta$  9.66 (d,  $J=4.52\text{Hz}$ , 2H), 9.57 (d,  $J=4.52\text{Hz}$ , 2H), 8.83 (d,  $J=4.08\text{Hz}$ , 2H), 8.80 (d,  $J=4.52\text{Hz}$ , 2H), 7.94 (d,  $J=7.24\text{Hz}$ , 1H), 7.88 (s, 1H), 7.58-7.76 (m, 9H), 7.32-7.34 (m, 8H), 7.07 (d,  $J=5.24\text{Hz}$ , 3H), 7.01 (d,  $J=8.48\text{Hz}$ , 4H), 3.86 (t,  $J=3.33\text{Hz}$ , 8H), 1.1.85-1.99 (m, 12H), 1.41 -1.42 (m, 21H), 1.10-1.22 (m, 36H), 0.93-0.83 (m, 40H), 0.69-0.74 (m, 14H), 0.59-0.47 (m, 36H). MS ( $m/z$ , TOF) calcd for  $\text{C}_{152}\text{H}_{201}\text{N}_5\text{O}_4\text{SiZn}$  2255.7, found 2255.3  $[\text{M}]^+$ .

**4b.** Green solid (120 mg, 16.3%). <sup>1</sup>H NMR (CDCl<sub>3</sub>/d<sub>5</sub>-pyridine, 400MHz) δ 9.65 (d, J=4.48Hz, 2H), 9.56 (d, J=4.52Hz, 2H), 8.82 (d, J=4.48Hz, 2H), 8.79 (d, J=4.52Hz, 2H), 7.91 (d, J=7.64Hz, 1H), 7.85 (s, 1H), 7.67-7.74 (m, 3H), 7.60 (d, J=7.80Hz, 1H), 7.15 (d, J=1.96Hz, 1H), 7.00-7.08 (m, 13H), 3.85 (t, J=6.60Hz, 8H), 2.60 (t, J=7.78Hz, 4H), 1.85-1.88 (m, 4H), 1.61-1.66 (m, 4H), 1.41-1.42 (m, 21H), 1.34-1.37 (m, 12H), 1.13-1.19 (m, 12H), 0.89-0.94 (m, 20H), 0.70-0.84 (m, 20H), 0.45-0.61 (m, 36H). MS (m/z, TOF) calcd for C<sub>126</sub>H<sub>169</sub>N<sub>5</sub>O<sub>4</sub>SiZn 1911.2, found 1912.9 [M+1]<sup>+</sup>.

**4c.** Purple solid (80 mg, 20.4%). <sup>1</sup>H NMR (CDCl<sub>3</sub>/d<sub>5</sub>-pyridine, 400MHz) δ 9.66 (d, J=4.48Hz, 2H), 9.57 (d, J=4.48Hz, 2H), 8.84 (d, J=4.48Hz, 2H), 8.80 (d, J=4.52Hz, 2H), 7.97 (d, J=1.12Hz, 1H), 7.90 (s, 1H), 7.84 (d, J=7.80Hz, 1H), 7.78 (d, J=6.32Hz, 1H), 7.70 (t, J=8.40Hz, 2H), 7.34-7.42 (m, 3H), 7.01 (d, J=8.48Hz, 4H), 3.86 (t, J=6.62Hz, 8H), 2.08-2.13 (m, 4H), 1.41-1.42 (m, 21H), 1.06-1.18 (m, 12H), 0.87-0.98 (m, 14H), 0.68-0.80 (m, 20H), 0.49-0.61 (m, 30H). MS (m/z, TOF) calcd for C<sub>102</sub>H<sub>136</sub>N<sub>4</sub>O<sub>4</sub>SiZn 1575.7, found 1576.4 [M]<sup>+</sup>.

**The synthesis of ZZX-N3~N5.** To a solution of Compound **4** (0.07 mmol) in dry THF (25 ml) was added TBAF (385 ml, 1M in THF) under N<sub>2</sub>. The reaction mixture was stirred at room temperature for 0.5h and then quenched by water. The mixture was extracted with CH<sub>2</sub>Cl<sub>2</sub> and dried over anhydrous MgSO<sub>4</sub>. the solvent of organic layer was removed under reduced pressure. The residue was dissolved in a mixture of dry THF (18 ml) and dry TEA (4 ml) and degassed with nitrogen for 30 minutes. Then Pd<sub>2</sub>(dba)<sub>3</sub> (0.017 mmol), AsPh<sub>3</sub> (0.136 mmol), and 4-iodobenzoic acid (0.136 mmol) were added. The solution was refluxed under N<sub>2</sub> for 4h. Then the solvent was removed under reduced pressure and residue was subjected to column chromatography (silica gel) using CH<sub>2</sub>Cl<sub>2</sub>/MeOH=20/1(v:v) as eluent. Recrystallization from CH<sub>2</sub>Cl<sub>2</sub>/MeOH gave the final porphyrin dyes.

**ZZX-N3.** Green solid (130 mg, 85.6%). <sup>1</sup>H NMR (CDCl<sub>3</sub>/d<sub>5</sub>-pyridine, 400MHz) δ

9.66 (d,  $J=4.48\text{Hz}$ , 2H), 9.59 (d,  $J=4.52\text{Hz}$ , 2H), 8.83 (d,  $J=4.52\text{Hz}$ , 4H), 8.29 (d,  $J=8.24\text{Hz}$ , 2H), 8.03 (d,  $J=8.16\text{Hz}$ , 2H), 7.94 (d,  $J=8.52\text{Hz}$ , 1H), 7.88 (s, 1H), 7.58-7.77 (m, 9H), 7.32-7.34 (m, 8H), 7.07-7.10 (m, 3H), 7.02 (d,  $J=8.52\text{Hz}$ , 4H), 3.87 (t,  $J=6.52\text{Hz}$ , 8H), 1.85-2.00 (m, 12H), 1.10-1.27 (m, 36H), 0.93-0.83 (m, 40H), 0.76-0.85 (m, 14H), 0.60-0.46 (m, 36H). MS ( $m/z$ , TOF) calcd for  $\text{C}_{150}\text{H}_{185}\text{N}_5\text{O}_6\text{Zn}$  2219.5, found 2220.1 $[\text{M}]^+$ .

**ZZX-N4.** Green solid (70 mg, 63.5%).  $^1\text{H}$  NMR ( $\text{CDCl}_3/\text{d}_5\text{-pyridine}$ , 400MHz)  $\delta$  9.66 (d,  $J=4.48\text{Hz}$ , 2H), 9.59 (d,  $J=4.48\text{Hz}$ , 2H), 8.83 (d,  $J=4.48\text{Hz}$ , 4H), 8.29 (d,  $J=8.24\text{Hz}$ , 2H), 8.03 ((d,  $J=8.20\text{Hz}$ , 2H),) 7.92 (d,  $J=6.96\text{Hz}$ , 2H), 7.86 (s, 1H), 7.69-7.75 (m, 3H), 7.60 (d,  $J=8.16\text{Hz}$ , 1H), 7.15 (d,  $J=1.84\text{Hz}$ , 1H), 7.02-7.08 (m, 13H), 3.87 (t,  $J=6.52\text{Hz}$ , 8H), 2.60 (t,  $J=7.78\text{Hz}$ , 4H), 1.86-1.88 (m, 4H), 1.61-1.66 (m, 4H), 1.34-1.37 (m, 12H), 1.17-1.22 (m, 12H), 0.91-0.97 (m, 20H), 0.72-0.84 (m, 20H), 0.46-0.62 (m, 36H). MS ( $m/z$ , TOF) calcd for  $\text{C}_{124}\text{H}_{153}\text{N}_5\text{O}_6\text{Zn}$  1875.0, found 1575.1 $[\text{M}]^+$ .

**ZZX-N5.** Green solid (85 mg, 78.9%).  $^1\text{H}$  NMR ( $\text{CDCl}_3/\text{d}_5\text{-pyridine}$ , 400MHz)  $\delta$  9.66 (d,  $J=4.48\text{Hz}$ , 2H), 9.60 (d,  $J=4.50\text{Hz}$ , 2H), 8.84 (q,  $J=2.27\text{Hz}$ , 4H), 8.29 (d,  $J=8.28\text{Hz}$ , 2H), 8.03 (d,  $J=8.16\text{Hz}$ , 2H), 7.96 (d,  $J=7.76\text{Hz}$ , 1H), 7.91 (s, 1H), 7.85 (d,  $J=7.80\text{Hz}$ , 1H), 7.72 (t,  $J=8.46\text{Hz}$ , 2H), 7.32-7.43 (m, 3H), 7.03 (d,  $J=8.48\text{Hz}$ , 4H), 3.88 (t,  $J=6.54\text{Hz}$ , 8H), 1.85-1.83 (m, 4H), 1.11-1.27 (m, 26H), 0.73-0.97 (m, 20H), 0.46-0.62 (m, 36H). MS ( $m/z$ , TOF) calcd for  $\text{C}_{100}\text{H}_{120}\text{N}_4\text{O}_6\text{Zn}$  1539.4, found 1540.0  $[\text{M}]^+$ .

### Synthesis of complementary Dye

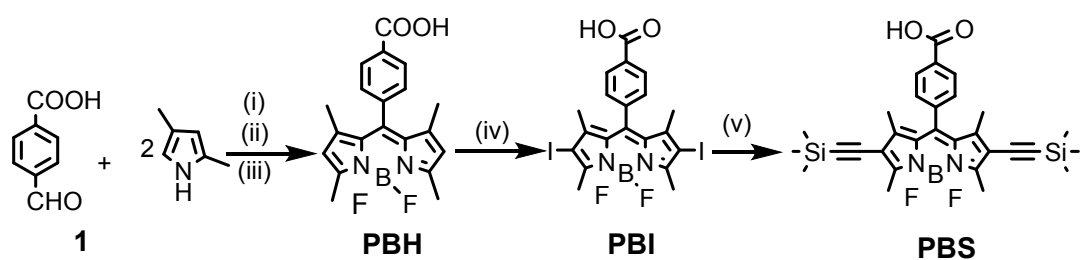

Scheme 3 Synthesis of complementary dye PBS Reaction conditions: (i) TFA,  $\text{CH}_2\text{Cl}_2$ , overnight,  $\text{N}_2$ , (ii) DDQ, 10 minutes, (iii) TEA,  $\text{BF}_3\cdot\text{OEt}_2$ , (iv)  $\text{I}_2$ ,  $\text{HIO}_3$ ,  $\text{EtOH}$ ,  $60^\circ\text{C}$ , 1h, (v)

ethynyltriisopropylsilane, Pd(PPh<sub>3</sub>)<sub>2</sub>Cl<sub>2</sub>, CuI, THF, TEA.

**Synthesis of PBH.** To a flask was added pyrrole (0.92 mL, 8.97 mmol), formylbenzoic acid (0.6 g, 4.0 mmol) absolute CH<sub>2</sub>Cl<sub>2</sub> (200 mL) under nitrogen atmosphere. One drop of trifluoroacetic acid was added to initiate the reaction. The resulting mixture was stirred for 12h at room temperature. Then dichlorodicyanobenzoquinone (0.9 g, 4 mmol) in CH<sub>2</sub>Cl<sub>2</sub> (100 mL) was added. The color of the solution became purple. After continued stirring for 10 min, triethylamine (8 mL) and BF<sub>3</sub>·OEt<sub>2</sub> (8 mL) were added consecutively. Then the solution was stirring for another 6 h. And then the black and majority of redish impurities were first removed by a flash chromatograph. Orange color powder (0.3 g, 40%). <sup>1</sup>H NMR (CDCl<sub>3</sub>, 400MHz): 8.25(d, 2H); 7.45(d, 2H); 5.95(s, 2H); 2.50(s, 6H); 1.45(s, 6H). MS (m/z, ESI) calcd for C<sub>20</sub>H<sub>19</sub>BF<sub>2</sub>N<sub>2</sub>O<sub>2</sub>, 368.2, found 367.0 [M-1]<sup>-</sup>.

**Synthesis of PBI.** To 0.30 g (0.815 mmol) of PBH in 40 mL of ethanol, 0.52 g (2.04 mmol) of I<sub>2</sub> was added and stirred magnetically till it was dissolved. Then, 0.286 g (1.63 mmol) of HIO<sub>3</sub> was dissolved in water (1mL), and added dropwise by a syringe during 30 minutes at room temperature. After the addition was complete, the solution was heated to 60°C and refluxed for 1 h. The fluorescence was quenched and color of the solution became purple. The progress of the reaction was followed by TLC until completion. Ethanol and water were removed by evaporator under vacuum. The solid was dissolved in chloroform and purified by column chromatography with a silica gel solid phase and chloroform/methanol as the eluting solvent. The product PBI was collected as the first fraction. Purple color powder (0.25 g, 50%). <sup>1</sup>H NMR (CDCl<sub>3</sub>, 400MHz): 8.35 (d, 2H); 7.20 (d, 2H); 2.65 (s, 6H); 1.45 (s, 6H). MS (M-1/z, ESI) calcd for C<sub>20</sub>H<sub>17</sub>BF<sub>2</sub>I<sub>2</sub>N<sub>2</sub>O<sub>2</sub>, 619.9, found 618.7[M-1]<sup>-</sup>.

**Synthesis of PBS.** To a round bottom flask was added PBI (300 mg), Pd(PPh<sub>2</sub>)Cl<sub>2</sub> (10 mol%), PPh<sub>3</sub> (10 mol%), CuI (20 mol%) under N<sub>2</sub>. Then dye THF (10 mL), Et<sub>3</sub>N (5 mL), and trimethylsilylacetylene (4 times of PBI) were added to the flask and the

reaction was carried out at 60°C for 12 h. The typical fluorescence should be recovered after the reaction. After cooling the reaction mixture to room temperature, the solvent was removed under reduced pressure. The crude product directly purified by silica gel chromatography using dichloromethane or chloroform. Orange color powder (0.12 g, 45%). <sup>1</sup>H NMR (CDCl<sub>3</sub>, 400MHz): 8.15 (d, 2H); 7.30 (d, 2H); 2.50 (s, 6H); 1.30 (s, 6H); 0.10 (s, 18H). MS (m/z, ESI) calcd for C<sub>30</sub>H<sub>35</sub>BF<sub>2</sub>I<sub>2</sub>N<sub>2</sub>O<sub>2</sub>Si<sub>2</sub> 560.2, found 559.0 [M-1]<sup>-</sup>.

**Table S1.** Photovoltaic parameters of ZZX-N3, ZZX-N4 and ZZX-N5 sensitized solar cells\*

|            | Cell    | J <sub>SC</sub> (mA/cm <sup>2</sup> ) | V <sub>OC</sub> (mV) | FF           | η (%)       |
|------------|---------|---------------------------------------|----------------------|--------------|-------------|
| ZZX-N3     | a       | 9.99                                  | 656                  | 0.588        | 3.85        |
|            | b       | 9.87                                  | 662                  | 0.584        | 3.81        |
|            | Average | 9.93 ± 0.06                           | 659 ± 3              | 0.586 ± 0.02 | 3.83 ± 0.02 |
| ZZX-N4     | a       | 9.92                                  | 664                  | 0.639        | 4.21        |
|            | b       | 10.03                                 | 660                  | 0.635        | 4.20        |
|            | Average | 9.97 ± 0.05                           | 662 ± 2              | 0.637 ± 0.02 | 4.20 ± 0.01 |
| ZZX-N5     | a       | 8.70                                  | 650                  | 0.653        | 3.69        |
|            | b       | 8.88                                  | 648                  | 0.644        | 3.70        |
|            | Average | 8.79 ± 0.09                           | 649 ± 1              | 0.649 ± 0.05 | 3.70 ± 0.01 |
| ZZX-N3/PBS | a       | 7.67                                  | 635                  | 0.661        | 3.22        |
|            | b       | 7.78                                  | 633                  | 0.665        | 3.27        |
|            | Average | 7.73 ± 0.05                           | 632 ± 1              | 0.662 ± 0.03 | 3.24 ± 0.03 |
| ZZX-N4/PBS | a       | 8.94                                  | 646                  | 0.661        | 3.81        |
|            | b       | 8.82                                  | 640                  | 0.655        | 3.70        |
|            | Average | 8.88 ± 0.06                           | 643 ± 3              | 0.658 ± 0.03 | 3.75 ± 0.05 |
| ZZX-N5/PBS | a       | 6.36                                  | 651                  | 0.672        | 2.78        |
|            | b       | 6.28                                  | 655                  | 0.666        | 2.73        |
|            | Average | 6.32 ± 0.04                           | 653 ± 2              | 0.669 ± 0.03 | 2.76 ± 0.02 |

## Reference

1. S. H. Lee, T. Nakamura and T. Tsutsui. *Org. Lett.*, 2001, **3**, 2005-2007.
2. A. Yella, H.-W. Lee, H. N. Tsao, C. Yi, A. K. Chandiran, M. K. Nazeeruddin, E. W.-G. Diao, C.-Y. Yeh, S. M. Zakeeruddin and M. Grätzel, *Science*, 2011, **334**, 629-634.





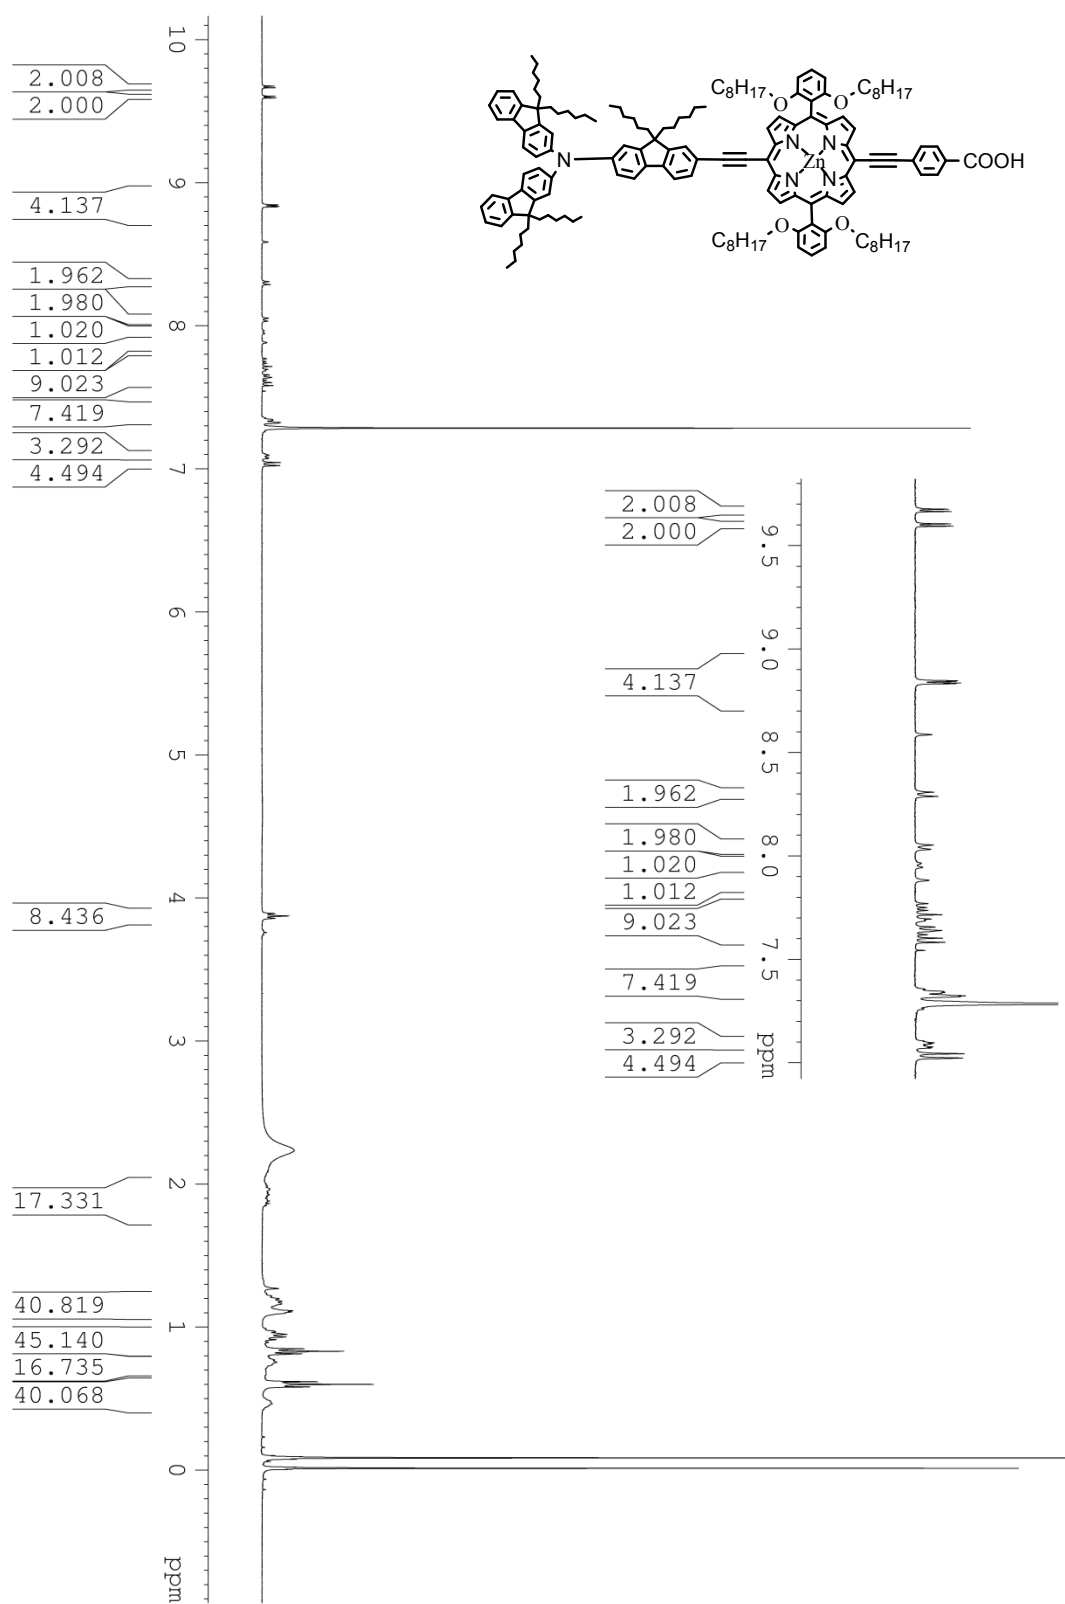

Figure S1 <sup>1</sup>H NMR of ZZX-N3 (CDCl<sub>3</sub>/d<sub>5</sub>-pyridine)

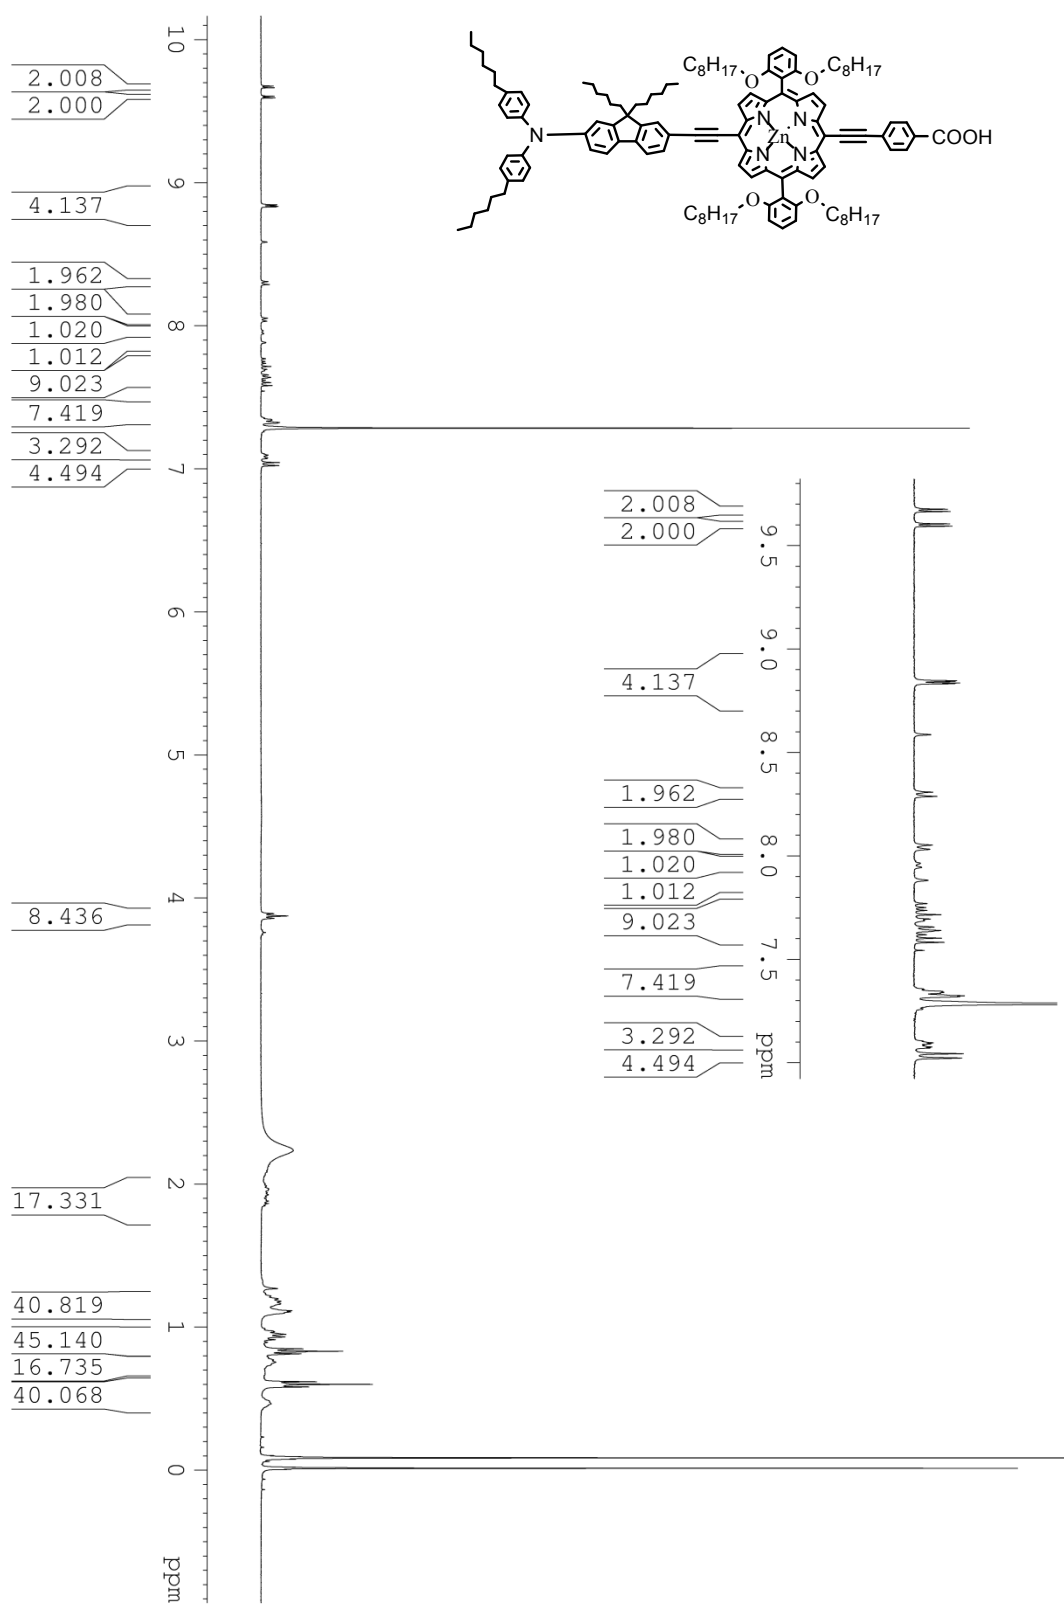

Figure S2  $^1\text{H}$  NMR of ZZX-N4 ( $\text{CDCl}_3/\text{d}_5\text{-pyridine}$ )

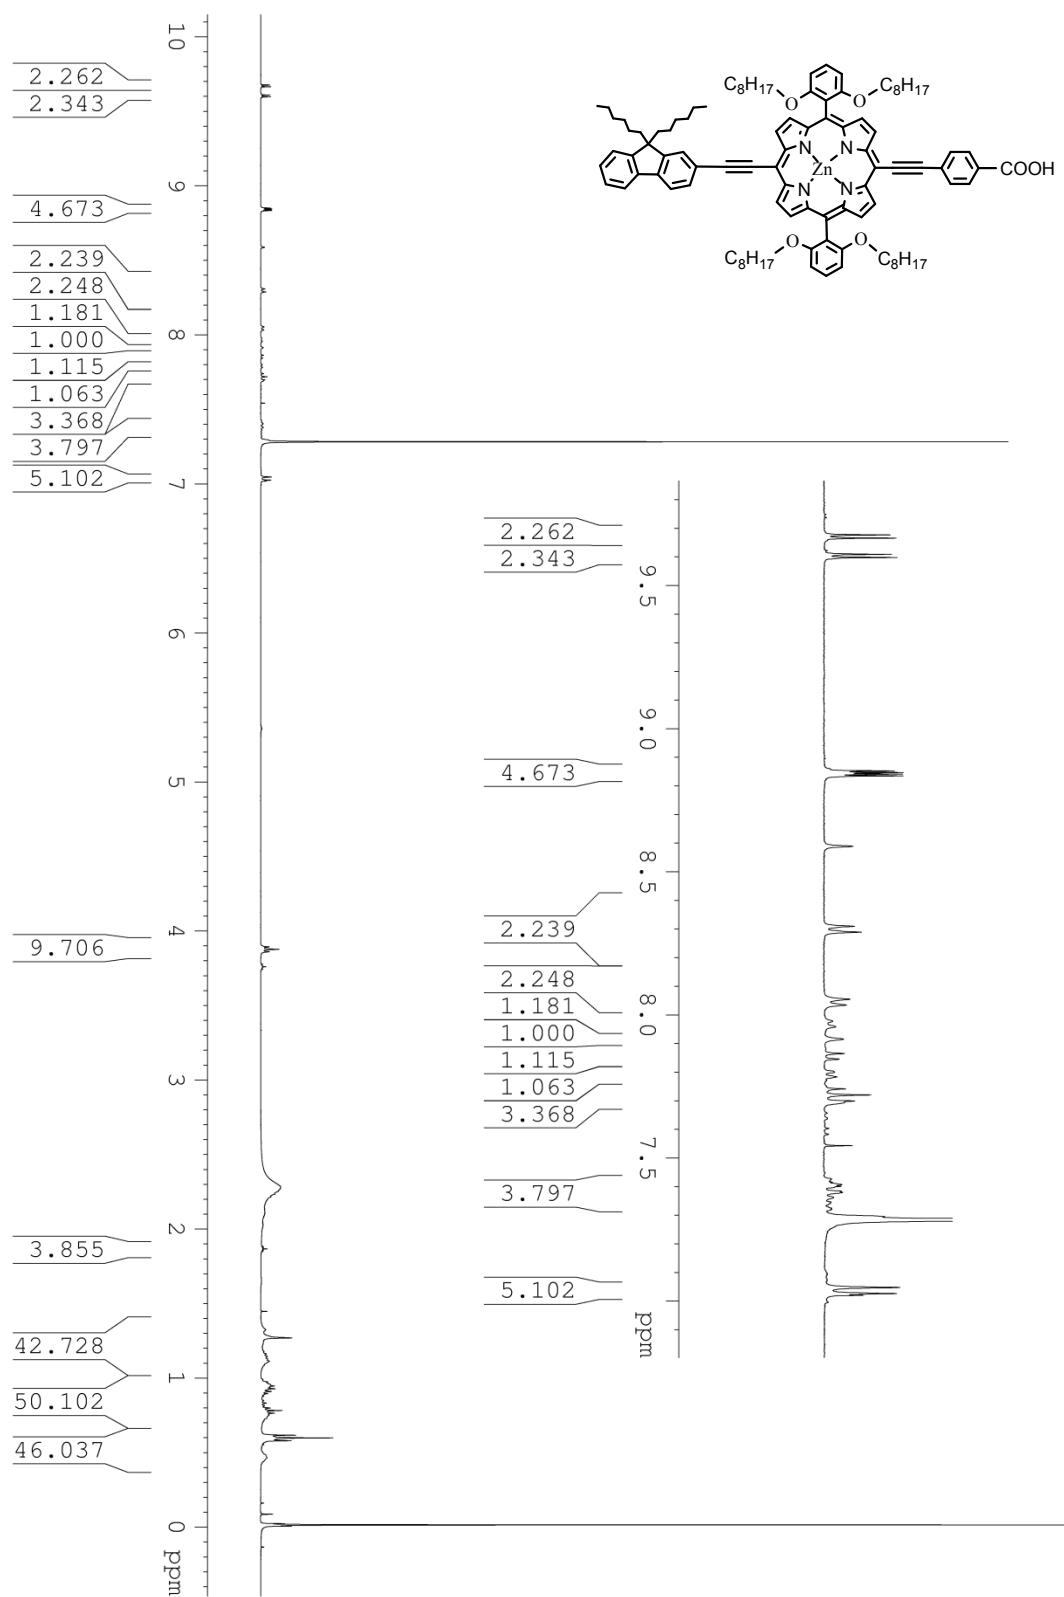

Figure S3 <sup>1</sup>H NMR of ZZX-N5 (CDCl<sub>3</sub>/d<sub>5</sub>-pyridine)
